# Supplementary material for: Protective Effect of a Mixture of Astragalus membranaceus and Lithospermum erythrorhizon Extract against Hepatic Steatosis in High Fat Diet‐Induced Nonalcoholic Fatty Liver Disease Mice
Source: Hindawi journal article supplement (doi:10.1155/2020/8370698), 2020-01-01
Supplement: f1 [file 8370698.f1.pdf]

664

**Supplementary Figure 1.**

665

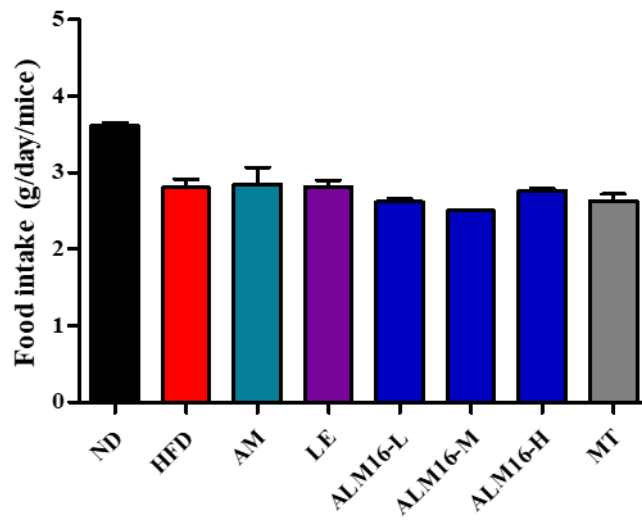

666

667 **Supplementary Figure 1: Effects of ALM16 and individual extracts (AM and LE) on food intake (n=6). Data are**  
668 **expressed as mean  $\pm$  standard error of the mean (SEM). \* $P < 0.05$ , \*\* $P < 0.01$  and \*\*\* $P < 0.001$  vs HFD group.**  
669 **ND, normal diet; HFD, high fat diet; AM, HFD + AM extract (100 mg/kg); LE, HFD + LE extract (100 mg/kg);**  
670 **ALM16-L, HFD + ALM16 (50 mg/kg); ALM16-M, HFD + ALM16 (100 mg/kg); ALM16-H, HFD + ALM16**  
671 **(200 mg/kg); MT, HFD + Milk thistle extract (100 mg/kg).**
